# Supplementary material
Source: MDPI journal article supplement (https://www.mdpi.com/2673-7272/1/3/16)
Supplement: s1 [file s1]

**Table S1.** Respondents' recommendations for their government on how to improve the way they work with OPDs.

| <b>Domains:</b>                          | <b>Categories:</b>                                                                    |
|------------------------------------------|---------------------------------------------------------------------------------------|
| Participation:                           | OPDs/Persons with Disabilities Should be Consulted or Decide Together with Government |
|                                          | Structured and Formal Participation is Needed                                         |
|                                          | Collaboration is Needed                                                               |
|                                          | Employ Persons with Disabilities in Government                                        |
|                                          | Address Disability as a Cross-Cutting Issue                                           |
|                                          | Financial Support is Needed                                                           |
|                                          | Convention on the Rights of Persons with Disabilities                                 |
|                                          | Participation and Inclusion of All OPDs and All Persons with Disabilities             |
|                                          | Participation at the Local/ Grassroots Level is Needed                                |
| Raising Awareness and Capacity-Building: | Awareness-Building                                                                    |
|                                          | Capacity-Building and Skills Training                                                 |
| Accessibility:                           | Accessibility                                                                         |
|                                          | Information Accessibility                                                             |
|                                          | Sign Language                                                                         |
| Inclusion:                               | Inclusion in Employment                                                               |
|                                          | Inclusion in Education                                                                |
| Legislation, Policies and Programmes:    | Participation in Planning and Development of Policies and Programmes                  |
|                                          | Participation in Monitoring and Evaluation of Policies and Programmes                 |
|                                          | Implementation of Policies, Legislation, Programmes, & the CRPD is Needed             |
|                                          | Monitoring, Evaluation and Accountability are Needed                                  |

**Table S2.** Respondents' recommendations to OPDs to improve the impact of their work with the UN.

| <b>Domains:</b>                 | <b>Categories:</b>                                                           |
|---------------------------------|------------------------------------------------------------------------------|
| Participation:                  | UN Should Consult or Decide Together with OPDs and Persons with Disabilities |
|                                 | Structured and Formal Participation is Needed                                |
|                                 | Financial Support is Needed                                                  |
|                                 | Address Disability as a Cross-cutting Issue                                  |
|                                 | Collaboration Between UN and OPDs is Needed                                  |
|                                 | Inclusion of Specific Groups of Persons with Disabilities is Needed          |
|                                 | Monitoring, Evaluation, and Accountability are Needed                        |
| Advocacy, Raising Awareness and | Advocacy is Needed                                                           |
| Capacity-Building:              | Awareness-Building                                                           |
|                                 | Capacity-Building and Skills Training                                        |
| Accessibility:                  | Accessibility                                                                |
|                                 | Information Accessibility                                                    |
| Human Rights:                   | Convention on the Rights of Persons with Disabilities                        |
|                                 | Human Rights                                                                 |
